# Supplementary material for: Alterations in Essential Fatty Acids, Immunoglobulins (IgA, IgG, and IgM), and Enteric Methane Emission in Primiparous Sows Fed Hemp Seed Oil and Their Offspring Response
Source: MDPI journal article supplement (doi:10.3390/vetsci9070352), 2022-07-11
Supplement: s1 [file s1]

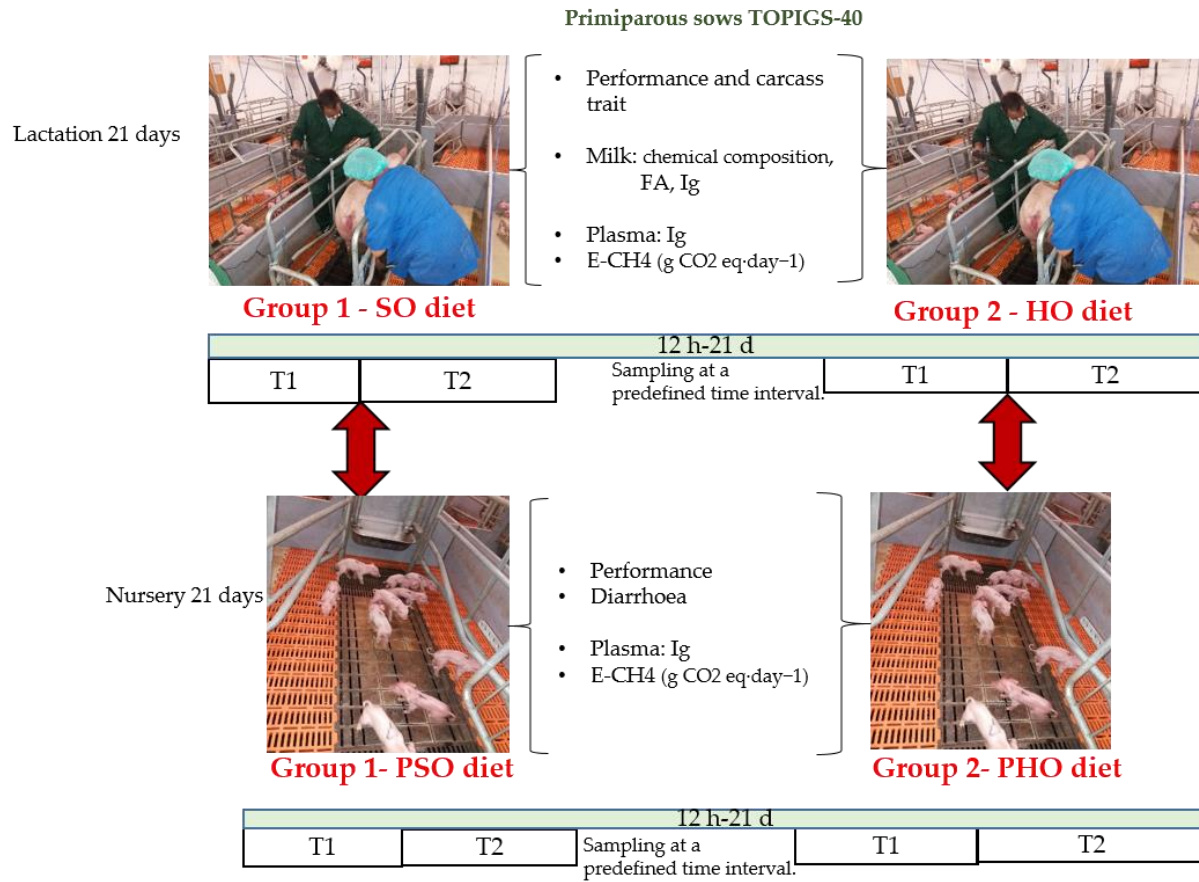

**Figure S1.** Experimental design

**Table S1.** Mean and SEM of sows feed intake, fat, dry matter, metabolizable energy

| Items           | Sows daily intake (kg x day <sup>-1</sup> ) |                    |                   |                    |
|-----------------|---------------------------------------------|--------------------|-------------------|--------------------|
|                 | ADFI                                        | FAT                | DM                | ME<br>(MJ/day)     |
| Diet            |                                             |                    |                   |                    |
| SO              | 4.84 <sup>a</sup>                           | 218.8 <sup>a</sup> | 4.25 <sup>a</sup> | 63.66 <sup>a</sup> |
| HO              | 4.86 <sup>a</sup>                           | 219.3 <sup>a</sup> | 4.27 <sup>a</sup> | 63.90 <sup>a</sup> |
| Period          |                                             |                    |                   |                    |
| 12 h-10 d       | 3.56 <sup>a</sup>                           | 0.161 <sup>a</sup> | 3.13 <sup>a</sup> | 46.9 <sup>a</sup>  |
| 10 d-21 d       | 5.01 <sup>b</sup>                           | 0.227 <sup>b</sup> | 4.41 <sup>b</sup> | 66.0 <sup>b</sup>  |
| 12 h-21 d       | 5.96 <sup>c</sup>                           | 0.269 <sup>c</sup> | 5.24 <sup>c</sup> | 78.4 <sup>c</sup>  |
| SEM             | 0.21                                        | 10.5               | 0.21              | 3.06               |
| <i>p</i> -Value |                                             |                    |                   |                    |
| Diet            | NS                                          | NS                 | NS                | NS                 |
| Period          | **                                          | ***                | ***               | ***                |
| Diet x Period   | NS                                          | NS                 | NS                | NS                 |

Abbreviations: average daily feed intake, ADFI; standard error of the mean, SEM.

<sup>a</sup>, <sup>b</sup>, <sup>c</sup> Different superscript letters indicate significantly different means; NS: nonsignificant effect; \*\*  $p < 0.01$  and \*\*\*  $p \leq 0.0001$  highly significant difference between means.

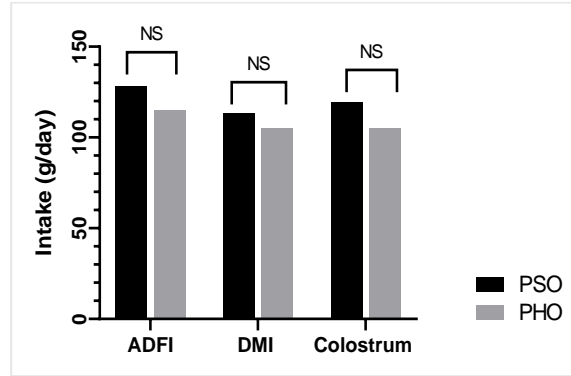

**Figure S2.** ADFI, fat and colostrum intake of piglets from sows fed a SO diet (PSO) or a HO diet based on a high level of n-3 fatty acids and lower n-6: n-3 ratio (PHO).

Abbreviations: average daily feed intake, ADFI; NS: nonsignificant effect \*\*  $p < 0.01$  and \*\*\*  $p \leq 0.001$  highly significant difference between means

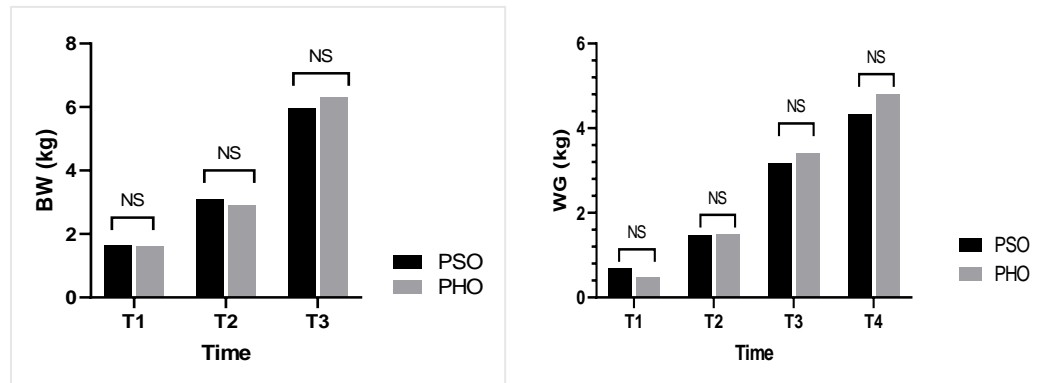

**Figure S3.** Growth parameters of piglets: BW of piglets from sows fed a SO diet (PSO) or a HO diet based on a high level of n-3 fatty acids and lower n-6: n-3 ratio (PHO) at different time points after farrowing: T1 (12h), T2 (10 days), and T3 (21days). Abbreviations: body weight, BW; PSO – piglets from sows fed SO diet; PHO – piglets from sows fed FO diet. NS: nonsignificant effect.
